# Supplementary material for: p38β, A Novel Regulatory Target of Pokemon in Hepatic Cells
Source: Int J Mol Sci. 2013 Jun 27;14(7):13511–24. doi: 10.3390/ijms140713511 (PMC3742200; doi:10.3390/ijms140713511)

# Supplementary Information

**Figure S1.** Cell growth rate by the MTT assay. **(a)** HL7702 cells were transfected with pcDNA3.1(–)-Pokemon (marked as Pok) or pcDNA3.1(–) (marked as 3.1); **(b)** Pokemon was silenced by si-RNA (marked as si-Pok) or scramble RNA (marked as N.C.) in BEL7404 cells. \*  $p < 0.05$  compared to the negative control group.

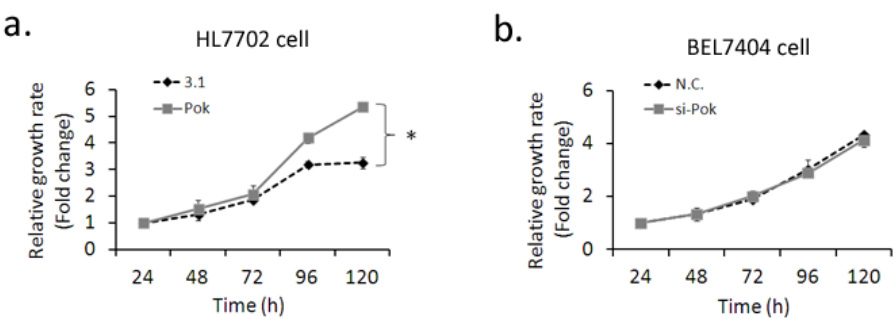

**Figure S2.** Silencing Pokemongene on BEL7404 cells metastasis. **(a)** *In vitro* migration assays; **(b)** *In vitro* invasion assays. Bar chart below the photo stands for the relative fold of the migrated or invaded cell number compared to the negative control group. \*  $p < 0.05$  compared to the negative control group.

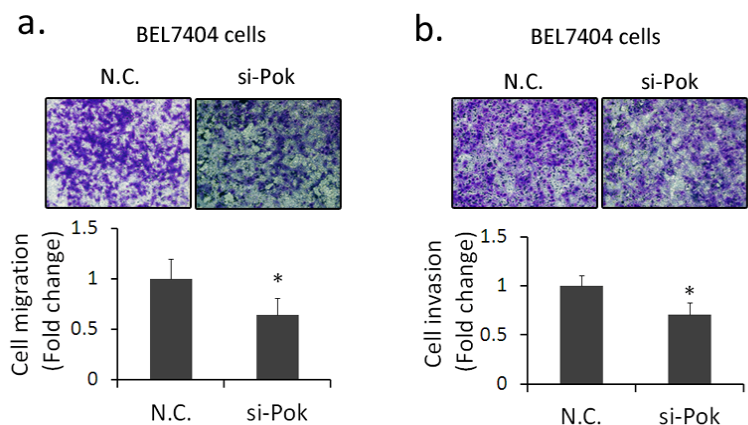

**Figure S3.** (a) HL7702 cell growth rate: Cells were treated with 25  $\mu$ M SB202190 at 24 h after transfecting with pcDNA3.1(–)-Pokemon or pcDNA3.1(–); (b–d) Effect of silencing Pokemongene and p38 inhibitor SB202190 on colony formation, migration and invasion in HepG2 cells: (b) The colony formation assay, the rate below the photostands for the proportion of final clone number accounted for in plated cell number; (c) *In vitro* migration assays; (d) *In vitro* invasion assays. Bar chart below the photo stands for the relative fold of the migrated or invaded cell number compared to the negative control group. \*  $p < 0.05$  compared to the negative control group.

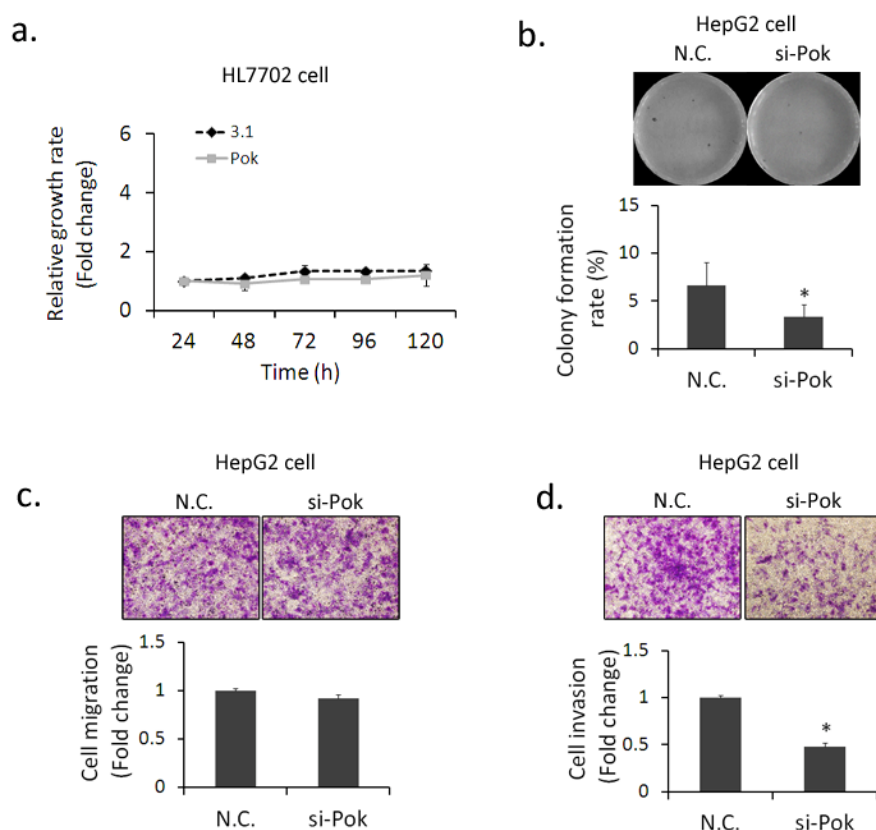

Supplement: Supplementary file 1 [file ijms-14-13511-s001.pdf]
